# Supplementary material for: Job Satisfaction Across the Workweek
Source: Atypon-hosted journal article supplement (doi:10.1026/0932-4089/a000426), 2023-12-19
Supplement: 0932-4089_a000426_esm1.pdf [file 0932-4089_a000426_esm1.pdf]

**ESM**  
**Supplementary file**

In order to test whether the affect facets (explicit and implicit PA and NA) relate to both the linear changes from Monday to Friday and/or to the TGIF Thursday-Friday contrast we performed a number of analyses, for explicit (analyses S1-S3) and implicit (analyses S4-S6) affect respectively, and separately for the Monday to Friday trajectory (analyses S1, S4) the TGIF Thursday-Friday contrast (analyses S2, S5) and conjointly (analyses S3, S6).

Note:

TIME : Average rate of growth in job satisfaction from Monday to Friday (coded 01233 - with Thursday and Friday levelling).

TIME<sub>contrast</sub> : Discontinuous time contrast between Thursday and Friday (coded 00001)

**E1.**

*Test of explicit affect moderating the week (TIME) trajectory on JS*

| Fixed Effect            | Coefficient        | Standard error     | <i>t</i> -ratio | Approx. <i>d.f.</i> | <i>p</i> -value |
|-------------------------|--------------------|--------------------|-----------------|---------------------|-----------------|
| For INTRCPT1, $\pi_0$   |                    |                    |                 |                     |                 |
| INTRCPT2, $\beta_{00}$  | 3.510873           | 0.052529           | 66.837          | 327                 | <0.001          |
| EPA, $\beta_{01}$       | 0.194008           | 0.127818           | 1.518           | 327                 | 0.130           |
| ENA, $\beta_{02}$       | -0.345976          | 0.109572           | -3.158          | 327                 | 0.002           |
| For TIME slope, $\pi_1$ |                    |                    |                 |                     |                 |
| INTRCPT2, $\beta_{10}$  | 0.070053           | 0.020780           | 3.371           | 327                 | <0.001          |
| EPA, $\beta_{11}$       | 0.061923           | 0.049010           | 1.263           | 327                 | 0.207           |
| ENA, $\beta_{12}$       | 0.095089           | 0.040588           | 2.343           | 327                 | 0.020           |
| Random Effect           | Standard Deviation | Variance Component | <i>d.f.</i>     | $\chi^2$            | <i>p</i> -value |
| INTRCPT1, $r_0$         | 0.65999            | 0.43558            | 327             | 621.69137           | <0.001          |
| TIME slope, $r_1$       | 0.19679            | 0.03873            | 327             | 447.52490           | <0.001          |
| level-1, $e$            | 0.84528            | 0.71450            |                 |                     |                 |

**Statistics for current covariance components model**

Deviance = 4619.192476

Number of estimated parameters = 4

Note. EPA = Explicit Positive Affect; ENA = Explicit Negative Affect.

**E2.**

*Test of explicit affect moderating the end of the week (TIMEcontract) trajectory on JS*

| Fixed Effect                                | Coefficient        | Standard error     | t-ratio | Approx. d.f. | p-value |
|---------------------------------------------|--------------------|--------------------|---------|--------------|---------|
| For INTRCPT1, $\pi_0$                       |                    |                    |         |              |         |
| INTRCPT2, $\beta_{00}$                      | 3.565909           | 0.037461           | 95.191  | 327          | <0.001  |
| EPA, $\beta_{01}$                           | 0.276195           | 0.090269           | 3.060   | 327          | 0.002   |
| ENA, $\beta_{02}$                           | -0.200898          | 0.080325           | -2.501  | 327          | 0.013   |
| For TIME <sub>contrast</sub> slope, $\pi_1$ |                    |                    |         |              |         |
| INTRCPT2, $\beta_{10}$                      | 0.355303           | 0.053826           | 6.601   | 327          | <0.001  |
| EPA, $\beta_{11}$                           | 0.146368           | 0.126977           | 1.153   | 327          | 0.250   |
| ENA, $\beta_{12}$                           | 0.130413           | 0.112509           | 1.159   | 327          | 0.247   |
| Random Effect                               | Standard Deviation | Variance Component | d.f.    | $\chi^2$     | p-value |
| INTRCPT1, $r_0$                             | 0.52571            | 0.27637            | 327     | 800.22091    | <0.001  |
| TIMEcontrast slope, $r_1$                   | 0.09992            | 0.00998            | 327     | 330.41899    | 0.437   |
| level-1, $e$                                | 0.87401            | 0.76389            |         |              |         |

**Statistics for current covariance components model**

Deviance = 4601.608445

Number of estimated parameters = 4

*Note.* EPA = Explicit Positive Affect; ENA = Explicit Negative Affect.

**E3.**

*Test of explicit affect moderating the week (TIME) and end of the week (TIMEcontrast) trajectories on JS*

| Fixed Effect                                | Coefficient        | Standard error     | <i>t</i> -ratio | Approx. <i>d.f.</i> | <i>p</i> -value |
|---------------------------------------------|--------------------|--------------------|-----------------|---------------------|-----------------|
| For INTRCPT1, $\pi_0$                       |                    |                    |                 |                     |                 |
| INTRCPT2, $\beta_{00}$                      | 3.550909           | 0.052826           | 67.218          | 327                 | <0.001          |
| EPA, $\beta_{01}$                           | 0.202565           | 0.127004           | 1.595           | 327                 | 0.112           |
| ENA, $\beta_{02}$                           | -0.347931          | 0.110875           | -3.138          | 327                 | 0.002           |
| For TIME slope, $\pi_1$                     |                    |                    |                 |                     |                 |
| INTRCPT2, $\beta_{10}$                      | 0.010000           | 0.022459           | 0.445           | 327                 | 0.656           |
| EPA, $\beta_{11}$                           | 0.049087           | 0.051012           | 0.962           | 327                 | 0.337           |
| ENA, $\beta_{12}$                           | 0.098022           | 0.044149           | 2.220           | 327                 | 0.027           |
| For TIME <sub>contrast</sub> slope, $\pi_2$ |                    |                    |                 |                     |                 |
| INTRCPT2, $\beta_{20}$                      | 0.340303           | 0.056886           | 5.982           | 327                 | <0.001          |
| EPA, $\beta_{21}$                           | 0.072738           | 0.127591           | 0.570           | 327                 | 0.569           |
| ENA, $\beta_{22}$                           | -0.016620          | 0.121403           | -0.137          | 327                 | 0.891           |
| Random Effect                               | Standard Deviation | Variance Component | <i>d.f.</i>     | $\chi^2$            | <i>p</i> -value |
| INTRCPT1, $r_0$                             | 0.67099            | 0.45023            | 327             | 629.68375           | <0.001          |
| TIME slope, $r_1$                           | 0.18801            | 0.03535            | 327             | 398.35530           | 0.004           |
| TIME <sub>contrast</sub> slope, $r_2$       | 0.13813            | 0.01908            | 327             | 300.66708           | >0.500          |
| level-1, $e$                                | 0.83034            | 0.68946            |                 |                     |                 |

**Statistics for current covariance components model**

Deviance = 4592.181832

Number of estimated parameters = 7

*Note.* EPA = Explicit Positive Affect; ENA = Explicit Negative Affect.

## Implicit Affect

### E4.

*Test of implicit affect moderating the week (TIME) trajectory on JSFinal estimation of fixed effects*

| Fixed Effect            | Coefficient        | Standard error     | <i>t</i> -ratio | Approx. <i>d.f.</i> | <i>p</i> -value |
|-------------------------|--------------------|--------------------|-----------------|---------------------|-----------------|
| For INTRCPT1, $\pi_0$   |                    |                    |                 |                     |                 |
| INTRCPT2, $\beta_{00}$  | 3.510873           | 0.054058           | 64.946          | 327                 | <0.001          |
| IPA, $\beta_{01}$       | 0.181208           | 0.165485           | 1.095           | 327                 | 0.274           |
| INA, $\beta_{02}$       | -0.384364          | 0.158119           | -2.431          | 327                 | 0.016           |
| For TIME slope, $\pi_1$ |                    |                    |                 |                     |                 |
| INTRCPT2, $\beta_{10}$  | 0.070053           | 0.020950           | 3.344           | 327                 | <0.001          |
| IPA, $\beta_{11}$       | -0.018267          | 0.062593           | -0.292          | 327                 | 0.771           |
| INA, $\beta_{12}$       | 0.013315           | 0.051654           | 0.258           | 327                 | 0.797           |
| Random Effect           | Standard Deviation | Variance Component | <i>d.f.</i>     | $\chi^2$            | <i>p</i> -value |
| INTRCPT1, $r_0$         | 0.69990            | 0.48986            | 327             | 658.41219           | <0.001          |
| TIME slope, $r_1$       | 0.20271            | 0.04109            | 327             | 454.88253           | <0.001          |
| level-1, $e$            | 0.84528            | 0.71450            |                 |                     |                 |

#### Statistics for current covariance components model

Deviance = 4648.790362

Number of estimated parameters = 4

*Note.* IPA = Implicit Positive Affect; INA = Implicit Negative Affect.

E5

*Test of implicit affect moderating the end of the week (TIMEcontrast) trajectory on JS*

| Fixed Effect                    | Coefficient        | Standard error     | <i>t</i> -ratio | Approx. <i>d.f.</i> | <i>p</i> -value |
|---------------------------------|--------------------|--------------------|-----------------|---------------------|-----------------|
| For INTRCPT1, $\pi_0$           |                    |                    |                 |                     |                 |
| INTRCPT2, $\beta_{00}$          | 3.565909           | 0.038910           | 91.645          | 327                 | <0.001          |
| IPA, $\beta_{01}$               | 0.178504           | 0.132884           | 1.343           | 327                 | 0.180           |
| INA, $\beta_{02}$               | -0.342583          | 0.123895           | -2.765          | 327                 | 0.006           |
| For TIMEcontrast slope, $\pi_1$ |                    |                    |                 |                     |                 |
| INTRCPT2, $\beta_{10}$          | 0.355303           | 0.053913           | 6.590           | 327                 | <0.001          |
| IPA, $\beta_{11}$               | -0.150887          | 0.148150           | -1.018          | 327                 | 0.309           |
| INA, $\beta_{12}$               | -0.089072          | 0.130569           | -0.682          | 327                 | 0.496           |
| Random Effect                   | Standard Deviation | Variance Component | <i>d.f.</i>     | $\chi^2$            | <i>p</i> -value |
| INTRCPT1, $r_0$                 | 0.55966            | 0.31322            | 327             | 863.33049           | <0.001          |
| TIMEcontrast slope, $r_1$       | 0.11451            | 0.01311            | 327             | 331.49052           | 0.421           |
| level-1, $e$                    | 0.87401            | 0.76389            |                 |                     |                 |

**Statistics for current covariance components model**

Deviance = 4626.997565

Number of estimated parameters = 4

*Note.* EPA = Explicit Positive Affect; ENA = Explicit Negative Affect.

**E6**

*Test of explicit affect moderating the week (TIME) and end of the week (TIMEcontrast) trajectories on JS*

| Fixed Effect                                | Coefficient        | Standard error     | <i>t</i> -ratio | Approx. <i>d.f.</i> | <i>p</i> -value |
|---------------------------------------------|--------------------|--------------------|-----------------|---------------------|-----------------|
| For INTRCPT1, $\pi_0$                       |                    |                    |                 |                     |                 |
| INTRCPT2, $\beta_{00}$                      | 3.618970           | 0.056846           | 63.663          | 327                 | <0.001          |
| IPA, $\beta_{01}$                           | 0.127862           | 0.166433           | 0.768           | 327                 | 0.443           |
| INA, $\beta_{02}$                           | -0.431472          | 0.165761           | -2.603          | 327                 | 0.010           |
| For TIME slope, $\pi_1$                     |                    |                    |                 |                     |                 |
| INTRCPT2, $\beta_{10}$                      | 0.010000           | 0.022621           | 0.442           | 327                 | 0.659           |
| IPA, $\beta_{11}$                           | 0.011370           | 0.064556           | 0.176           | 327                 | 0.860           |
| INA, $\beta_{12}$                           | 0.039486           | 0.058542           | 0.674           | 327                 | 0.500           |
| For TIME <sub>contrast</sub> slope, $\pi_2$ |                    |                    |                 |                     |                 |
| INTRCPT2, $\beta_{20}$                      | 0.340303           | 0.056823           | 5.989           | 327                 | <0.001          |
| IPA, $\beta_{21}$                           | -0.167941          | 0.141361           | -1.188          | 327                 | 0.236           |
| INA, $\beta_{22}$                           | -0.148300          | 0.146535           | -1.012          | 327                 | 0.312           |
| Random Effect                               | Standard Deviation | Variance Component | <i>d.f.</i>     | $\chi^2$            | <i>p</i> -value |
| INTRCPT1, $r_0$                             | 0.71309            | 0.50850            | 327             | 602.46089           | <0.001          |
| TIME slope, $r_1$                           | 0.19523            | 0.03812            | 327             | 404.49776           | 0.002           |
| TIME <sub>contrast</sub> slope, $r_2$       | 0.13996            | 0.01959            | 327             | 300.27437           | >0.500          |
| level-1, $e$                                | 0.82995            | 0.68882            |                 |                     |                 |

**Statistics for current covariance components model**

Deviance = 4619.233980

Number of estimated parameters = 7

*Note.* EPA = Explicit Positive Affect; ENA = Explicit Negative Affect.
